# Supplementary material for: The down-regulated ING5 expression in lung cancer: A potential target of gene therapy
Source: PubMed Central journal article supplement (PMC5342367; doi:10.18632/oncotarget.10519), 2016-07-09
Supplement: oncotarget-07-54596-s001.pdf [file oncotarget-07-54596-s001.pdf]

## The down-regulated ING5 expression in lung cancer: A potential target of gene therapy

### Supplementary Materials

**Supplementary Table S1:**

| Num | Antibody               | Species | Dilution | Company     | Code number |
|-----|------------------------|---------|----------|-------------|-------------|
| 1   | Cdc2 p34 (B-6)         | mouse   | 1:500    | Santa cruz  | sc-8395     |
| 2   | ATG13 (D4P1K)          | rabbit  | 1:500    | CST         | 13273       |
| 3   | ATG14                  | rabbit  | 1:500    | CST         | 5504        |
| 4   | Beclin1                | rabbit  | 1:1500   | Abcam       | ab55878     |
| 5   | LC3B                   | rabbit  | 1:500    | CST         | 3868        |
| 6   | Bax (B-9)              | mouse   | 1:500    | Santa cruz  | sc-7480     |
| 7   | Bcl-2 (C 21)           | rabbit  | 1:500    | Santa cruz  | sc-783      |
| 8   | XIAP (H-202)           | rabbit  | 1:500    | Santa cruz  | sc-11426    |
| 9   | AIF (E-1)              | mouse   | 1:700    | Santa cruz  | sc-13116    |
| 10  | cytochrome c (C-20)    | goat    | 1:500    | Santa cruz  | sc-8385     |
| 11  | Survivin(C-6)          | mouse   | 1:500    | Santa cruz  | sc-374616   |
| 12  | Akt1/2/3 (H-136)       | rabbit  | 1:500    | Santa cruz  | sc-8312     |
| 13  | $\beta$ -catenin(C-18) | goat    | 1:500    | Santa cruz  | sc-1496     |
| 14  | ADFP                   | rabbit  | 1:2000   | Abcam       | ab52355     |
| 15  | HXK1(N-19)             | goat    | 1:500    | Santa cruz  | sc-6517     |
| 16  | PDPc(D-11)             | mouse   | 1:500    | Santa cruz  | sc-398117   |
| 17  | PFK-1(K-15)            | goat    | 1:500    | Santa cruz  | sc-31712    |
| 18  | Citrate synthase(P-20) | goat    | 1:500    | Santa cruz  | sc-242444   |
| 19  | GAPDH                  | rabbit  | 1:2000   | Santa cruz  | 10494-1-Ap  |
| 20  | ING5                   | rabbit  | 1:1500   | Proteintech | 10665-1-Ap  |
